# Supplementary material for: Randomised placebo-controlled trials of individualised homeopathic treatment: systematic review and meta-analysis
Source: PubMed Central journal article supplement (PMC4326322; doi:10.1186/2046-4053-3-142), 2014-12-06

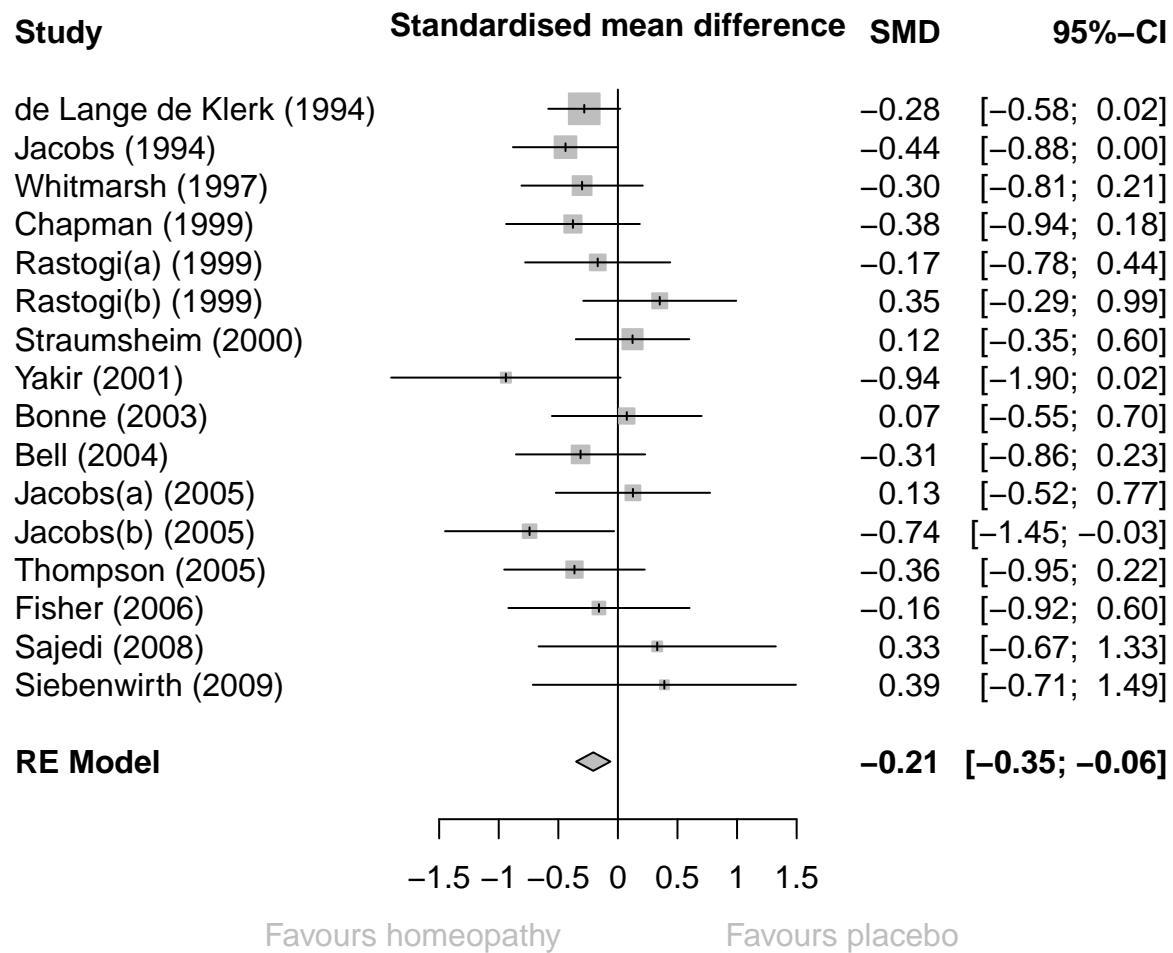

Supplement: 13643_2014_328_MOESM7_ESM.pdf [file 13643_2014_328_MOESM7_ESM.pdf]
